# Supplementary material for: A novel sandwich-type photoelectrochemical sensor for SCCA detection based on Ag2S-sensitized BiOI matrix and AucorePdshell nanoflower label for signal amplification
Source: Royal Society of Chemistry journal article supplement (doi:10.1039/c8nj03628d), 2018-01-01
Supplement: c8nj03628d1.pdf [file c8nj03628d1.pdf]

A novel sandwich-type photoelectrochemical sensor for SCCA  
detection based on Ag<sub>2</sub>S sensitized BiOI matrix and Au<sub>core</sub>Pd<sub>shell</sub>  
nanoflower label for signal amplification

Chunzhu Bao<sup>a</sup>, Chuanlei Wang<sup>a</sup>, Dawei Fan<sup>a,b\*</sup>, Hongmin Ma<sup>a</sup>, Lihua Hu<sup>a</sup>, Yingju Fan<sup>a</sup>, Qin Wei<sup>a\*</sup>

<sup>a</sup>*Key Laboratory of Interfacial Reaction & Sensing Analysis in Universities of Shandong, School of Chemistry and Chemical Engineering, University of Jinan, Jinan 250022, P. R. China.*

<sup>b</sup>*Key Laboratory of Sensor Analysis of Tumor Marker, Ministry of Education, Qingdao University of Science and Technology, Qingdao 266042, P. R. China.*

**\*Corresponding author**

E-mail: jndxfandawei@126.com (D. Fan)

sdjndxwq@163.com (Q. Wei)

Tel: +86-531-82760510

## 1. Materials and reagents

Disodium tetrachloropalladate ( $\text{Na}_2\text{PdCl}_4$ ),  $\text{Bi}(\text{NO}_3)_3 \cdot 5\text{H}_2\text{O}$  and ascorbic acid ( $\text{C}_6\text{H}_8\text{O}_6$ ) were obtained from Shanghai McLean biochemical technology Co., Ltd. Glacial acetic acid ( $\text{CH}_3\text{COOH}$ ) was obtained from yao shun import and export Co., Ltd, China. KI was obtained from Tianjin Damao chemical reagent factory.  $\text{HAuCl}_4 \cdot 6\text{H}_2\text{O}$  was purchased from Alfa Aesar. Trisodium citrate dihydrate ( $\text{Na}_3\text{C}_6\text{H}_5\text{O}_7 \cdot 2\text{H}_2\text{O}$ ) was obtained from Tianjin Guangcheng chemical reagent Co., Ltd. Polyvinyl pyrrolidone (PVP) was obtained from SIGMA-ALDRICH. Hydroquinone ( $\text{C}_6\text{H}_6\text{O}_2$ ) was obtained from pharmaceutical Shanghai chemical reagent Co., Ltd, China.  $\text{AgNO}_3$  was obtained from Shanghai reagent factory of China.  $\text{Na}_2\text{S} \cdot 9\text{H}_2\text{O}$  was obtained from Fine chemical plant of laiyang economic and technological development zone. Bovine serum albumin (BSA) was obtained from Sigma-Aldrich (Beijing, China). Thioglycolic acid (TGA) was obtained from Tianjin Kermel Chemical Reagent Co., Ltd. 1-ethyl-3-(3-dimethylaminopropyl) carbodiimide hydrochloride (EDC) and N-hydroxysuccinimide (NHS) were obtained from Aladdin Reagent Database Inc (Shanghai, China). Phosphate buffered saline (PBS, 1/15 mol/L  $\text{KH}_2\text{PO}_4$  and 1/15 mol/L  $\text{Na}_2\text{HPO}_4$ ) containing AA was used as an electrolyte for the PEC measurements. Indium tin oxide (ITO) glass was obtained from Zhuhai Kaivo Electronic Components Co., Ltd, China.

## 2. Apparatus

Electrochemical impedance spectroscopy (EIS) analysis was performed on an RST5200F electrochemical workstation (Zhengzhou Shiruisi Technology Co., Ltd,

China) with a three-electrode system in a 5.0 mmol/L  $[\text{Fe}(\text{CN})_6]^{3-/4-}$  solution containing 0.10 mol/L KCl. Scanning electron microscope (SEM) images and energy dispersive spectrometry (EDS) were obtained using a field emission SEM (Zeiss, Germany). Transmission electron micrographs (TEM) were measured on an H-800 microscope (Hitachi, Japan). X-ray diffraction (XRD) patterns were collected on a D8 advance X-ray diffractometer (Bruker AXS, Germany). UV-vis spectra were obtained on a Shimadzu UV-3101PC spectrometer (Japan). Photoluminescence (PL) emission spectra were acquired under excitation at 310 nm using an Edinburgh Instruments FLS920 spectrometer (Edinburgh Instruments, UK).

### 3. Optimization of experimental conditions

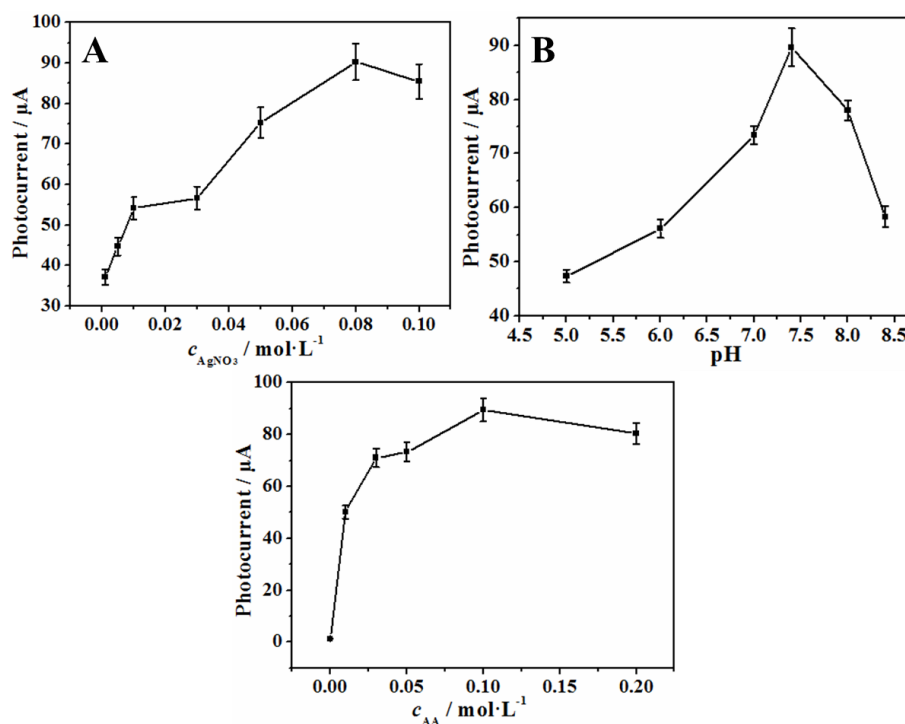

**Fig. S1.** Effects of concentration of  $\text{AgNO}_3$  (A), pH (B) and concentration of AA in the PBS buffer solution (C) on the photocurrent response of the ITO/BiOI/Ag<sub>2</sub>S electrode. The potential was 0 V.

#### 4. Simulation parameters of the equivalent circuit components

**Table S1.** Simulation parameters of the equivalent circuit components

| Electrode                                                                                                           | $R_s$<br>( $\Omega$ ) | $R_{et}$<br>( $\Omega$ ) | $C_{dl}$<br>(F)        | $Z_w$   |
|---------------------------------------------------------------------------------------------------------------------|-----------------------|--------------------------|------------------------|---------|
| ITO                                                                                                                 | 87.0                  | 14.85                    | $4.594 \times 10^{-7}$ | 0.00782 |
| ITO/BiOI                                                                                                            | 87.3                  | 32.78                    | $7.514 \times 10^{-6}$ | 0.01137 |
| ITO/BiOI/Ag <sub>2</sub> S                                                                                          | 81.3                  | 39.36                    | $4.188 \times 10^{-6}$ | 0.00729 |
| ITO/BiOI/Ag <sub>2</sub> S/TGA                                                                                      | 84.9                  | 45.35                    | $4.321 \times 10^{-6}$ | 0.00764 |
| ITO/BiOI/Ag <sub>2</sub> S/TGA/(EDC/NHS)                                                                            | 82.1                  | 59.57                    | $6.469 \times 10^{-6}$ | 0.00749 |
| ITO/BiOI/Ag <sub>2</sub> S/TGA/(EDC/NHS)/Ab <sub>1</sub>                                                            | 83.5                  | 70.50                    | $4.561 \times 10^{-6}$ | 0.00696 |
| ITO/BiOI/Ag <sub>2</sub> S/TGA/(EDC/NHS)/Ab <sub>1</sub> /SCCA                                                      | 87.0                  | 10.89                    | $4.191 \times 10^{-6}$ | 0.00545 |
| ITO/BiOI/Ag <sub>2</sub> S/TGA/(EDC/NHS)/Ab <sub>1</sub> /SCCA<br>/Au <sub>6</sub> Pd <sub>5</sub> @Ab <sub>2</sub> | 85.3                  | 105.1                    | $3.807 \times 10^{-6}$ | 0.00498 |

#### 5. Comparison of various methods for SCCA detection

**Table S2.** Comparing different methods of detecting SCCA

| Methods                               | Linear range<br>(pg·mL <sup>-1</sup> ) | LOD<br>(pg·mL <sup>-1</sup> ) | Reference    |
|---------------------------------------|----------------------------------------|-------------------------------|--------------|
| Electrochemiluminescence immunosensor | 1-10000                                | 0.4                           | <sup>1</sup> |
| Electrochemical immunosensor          | 0.1-80000                              | 33000                         | <sup>2</sup> |
| Photoelectrochemical immunoassay      | 0.8-80000                              | 0.21                          | <sup>3</sup> |
| Immunosensor                          | 100-5000                               | 0.3                           | <sup>4</sup> |
| Electrochemiluminescence immunosensor | 1-100000                               | 0.33                          | <sup>5</sup> |
| Photoelectrochemical immunoassay      | 0.01-100000                            | 0.0016                        | This work    |

From Table S2, it can be seen that the detection limit and linear range using PEC sensor based on Ag<sub>2</sub>S sensitized BiOI matrix and Au<sub>6</sub>Pd<sub>5</sub> nanoflower label for signal amplification is better or comparable to the results reported for the detection of SCCA. The reasons why the sensor has the low detection limit are as follows: Firstly, the surface of BiOI is uneven accompanied by a mass of holes structure, which is conducive to load nanoparticles to manufacture nanocomposites with superior

performance; secondly, the Ag<sub>2</sub>S improved the absorption of BiOI in the visible light region and promoted the photocurrent production distinctly; in addition, the signal amplification strategy is fulfilled by utilizing Au<sub>6</sub>Pd<sub>8</sub> as the label anchored secondary antibodies due to the absorption competition of visible-light resource and the efficient energy transfer between Au<sub>6</sub>Pd<sub>8</sub> and BiOI/Ag<sub>2</sub>S matrix; and lastly, the excellent PEC sensor based on sensitization and signal amplification protocols contributes to the ultrasensitive detection of SCCA.

## 6. The results of the SCCA determination in human serum sample

**Table S3.** The results of the SCCA determination in human serum sample

| Content of SCCA in the serum (ng·mL <sup>-1</sup> ) | The addition content (ng·mL <sup>-1</sup> ) | The detection content (ng·mL <sup>-1</sup> , <i>n</i> = 5) | RSD (% , <i>n</i> = 5) | Recovery (%) |
|-----------------------------------------------------|---------------------------------------------|------------------------------------------------------------|------------------------|--------------|
| 0.14                                                | 0.50                                        | 0.69,0.66,0.65,0.69,0.68                                   | 2.70                   | 107          |
|                                                     | 1.00                                        | 1.10,1.11,1.09,1.15,1.14                                   | 2.30                   | 97.8         |
|                                                     | 2.00                                        | 2.20,2.16,2.23,2.18,2.10                                   | 2.24                   | 102          |

## 7. Comparison between the proposed PEC sensor and the ELISA method

**Table S4.** Human serum sample analysis using the proposed method and the ELISA method

| Serum sample | ELISA (ng mL <sup>-1</sup> ) | Average (ng mL <sup>-1</sup> ) | <i>s</i> | RSD (%) | This method (ng mL <sup>-1</sup> ) | Average (ng mL <sup>-1</sup> ) | <i>s</i> | RSD (%) | Relative errors (%) | <i>F</i> <sup>a</sup> value |
|--------------|------------------------------|--------------------------------|----------|---------|------------------------------------|--------------------------------|----------|---------|---------------------|-----------------------------|
| 1            | 0.74                         | 0.71                           | 0.033    | 4.7     | 0.69                               | 0.73                           | 0.029    | 3.93    | 2.8                 | 1.29                        |
|              | 0.75                         |                                |          |         | 0.73                               |                                |          |         |                     |                             |
|              | 0.69                         |                                |          |         | 0.75                               |                                |          |         |                     |                             |
|              | 0.71                         |                                |          |         | 0.76                               |                                |          |         |                     |                             |
|              | 0.67                         |                                |          |         | 0.71                               |                                |          |         |                     |                             |
| 2            | 1.83                         | 1.88                           | 0.041    | 2.2     | 1.89                               | 1.82                           | 0.043    | 2.4     | -3.2                | 1.10                        |
|              | 1.87                         |                                |          |         | 1.82                               |                                |          |         |                     |                             |
|              | 1.91                         |                                |          |         | 1.83                               |                                |          |         |                     |                             |

---

|      |      |
|------|------|
| 1.93 | 1.78 |
| 1.85 | 1.79 |

---

<sup>a</sup>The  $F$  values refer to comparison of the proposed method with ELISA method. The theoretical values at 95% confidence limits:  $F = 6.39$ ,  $F = \frac{s^2_{\max}}{s^2_{\min}}$

## Reference

1. L. Wu, Y. Hu, Y. Sha, W. Li, T. Yan, S. Wang, X. Li, Z. Guo, J. Zhou and X. Su, *Talanta*, 2016, **160**, 247-255.
2. Y. Li, Y. Zhang, F. Li, J. Feng, M. Li, L. Chen and Y. Dong, *Biosens. Bioelectron.*, 2017, **92**, 33-39.
3. Y. Zhang, G. Sun, H. Yang, J. Yu, M. Yan and X. Song, *Biosens. Bioelectron.*, 2016, **79**, 55-62.
4. Y. Wu, Y. Zhao, Y. Wang, X. Ye, T. Wu, H. Deng, P. Wu and C. Li, *Biosens. Bioelectron.*, 2017, **96**, 140-145.
5. Z. Guo, L. Wu, Y. Hu, S. Wang and X. Li, *Biosens. Bioelectron.*, 2017, **95**, 27-33.
